# Supplementary material for: Genome-wide interaction analysis of folate for colorectal cancer risk
Source: PubMed Central journal article supplement (PMC10636229; doi:10.1016/j.ajcnut.2023.08.010), 2023-08-26
Supplement: mmc1.pdf [file mmc1.pdf]

**Genome-wide interaction analysis of folate for colorectal cancer risk**

Emmanouil Bouras et al. Online Supplementary Material.

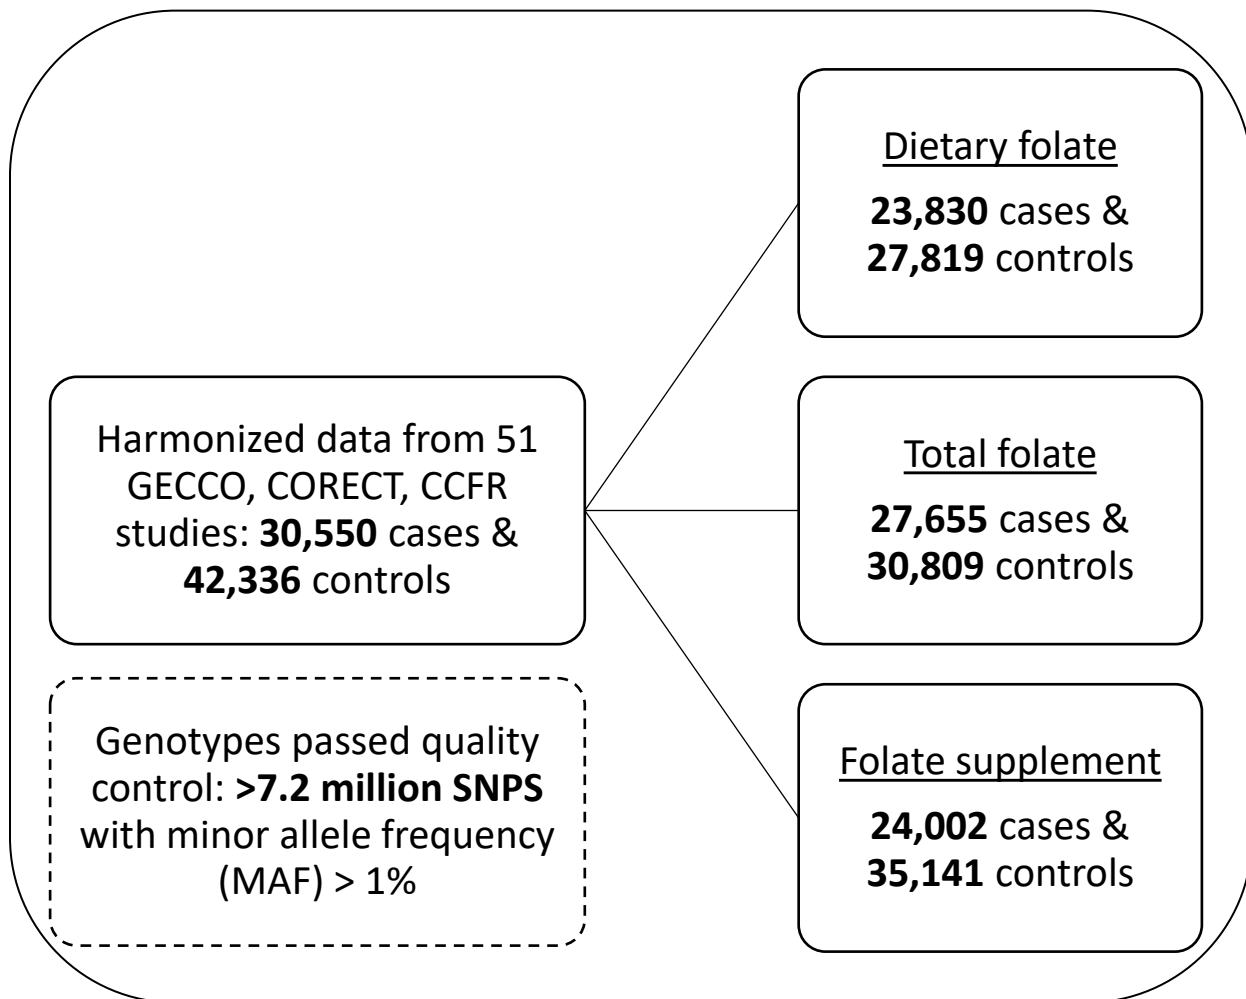

Figure S1. Participant flow chart.

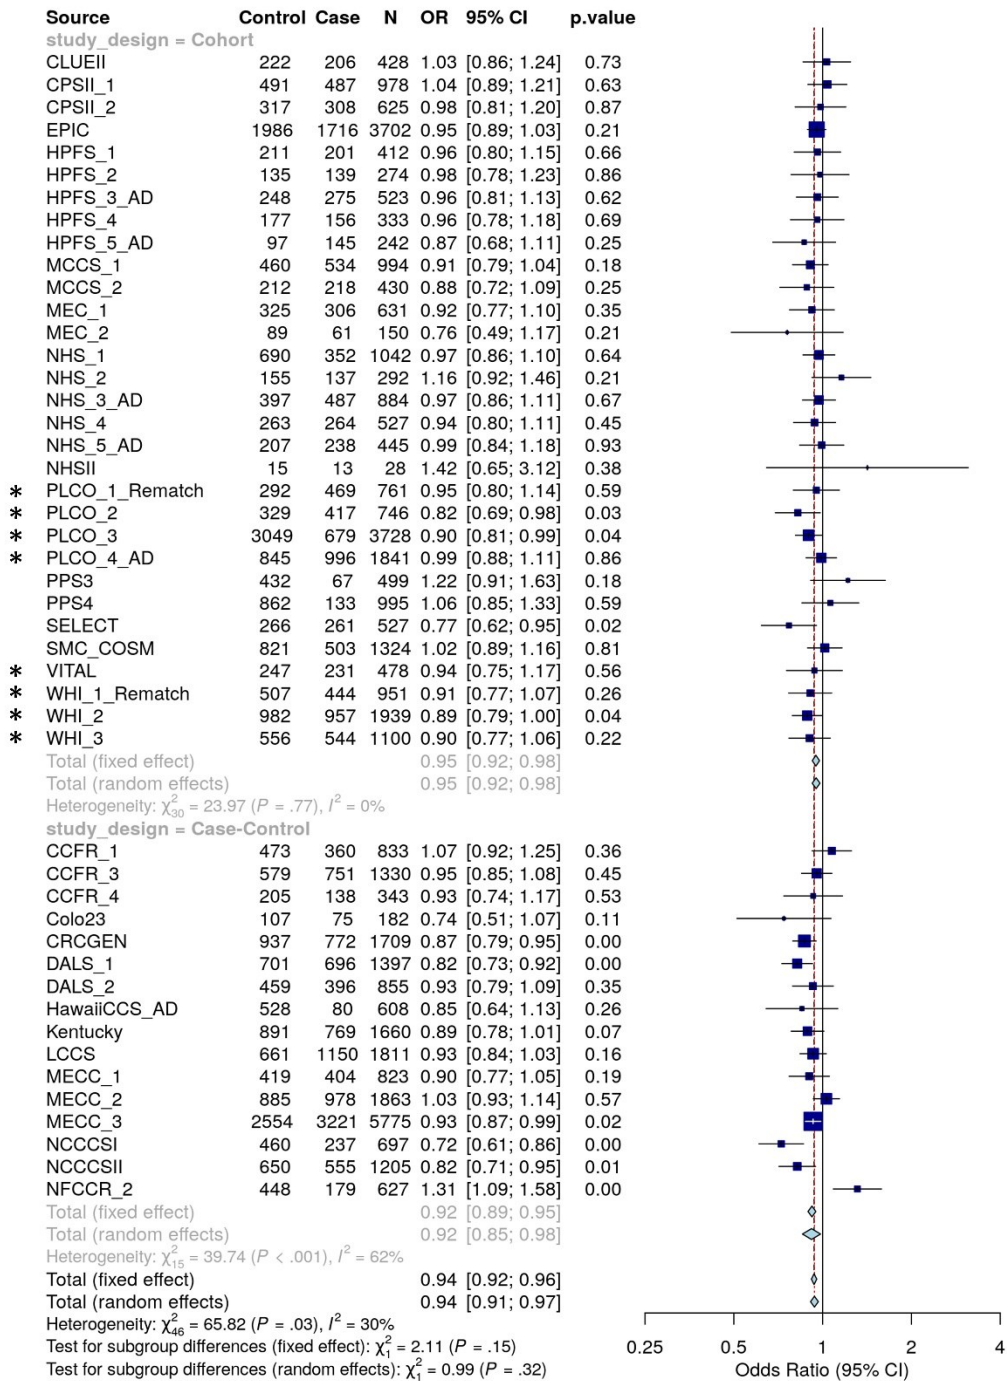

**Figure S2.** Meta-analysis of dietary folate on risk of colorectal cancer (CRC), stratified by study design. Per study models adjusted for age at referent time, sex, total energy consumption (kcal/day), body mass index (BMI), and smoking status (never/ever). In studies marked with an asterisk (\*) [namely, Prostate, Lung, Colorectal, & Ovarian Cancer Screening Trial (PLCO), VITamin And Lifestyle Study (VITAL), and Women’s Health Initiative (WHI)] times of enrollment overlapped or followed the period of folic acid fortification (1996-1998), which was accounted for when calculating dietary folate intake.

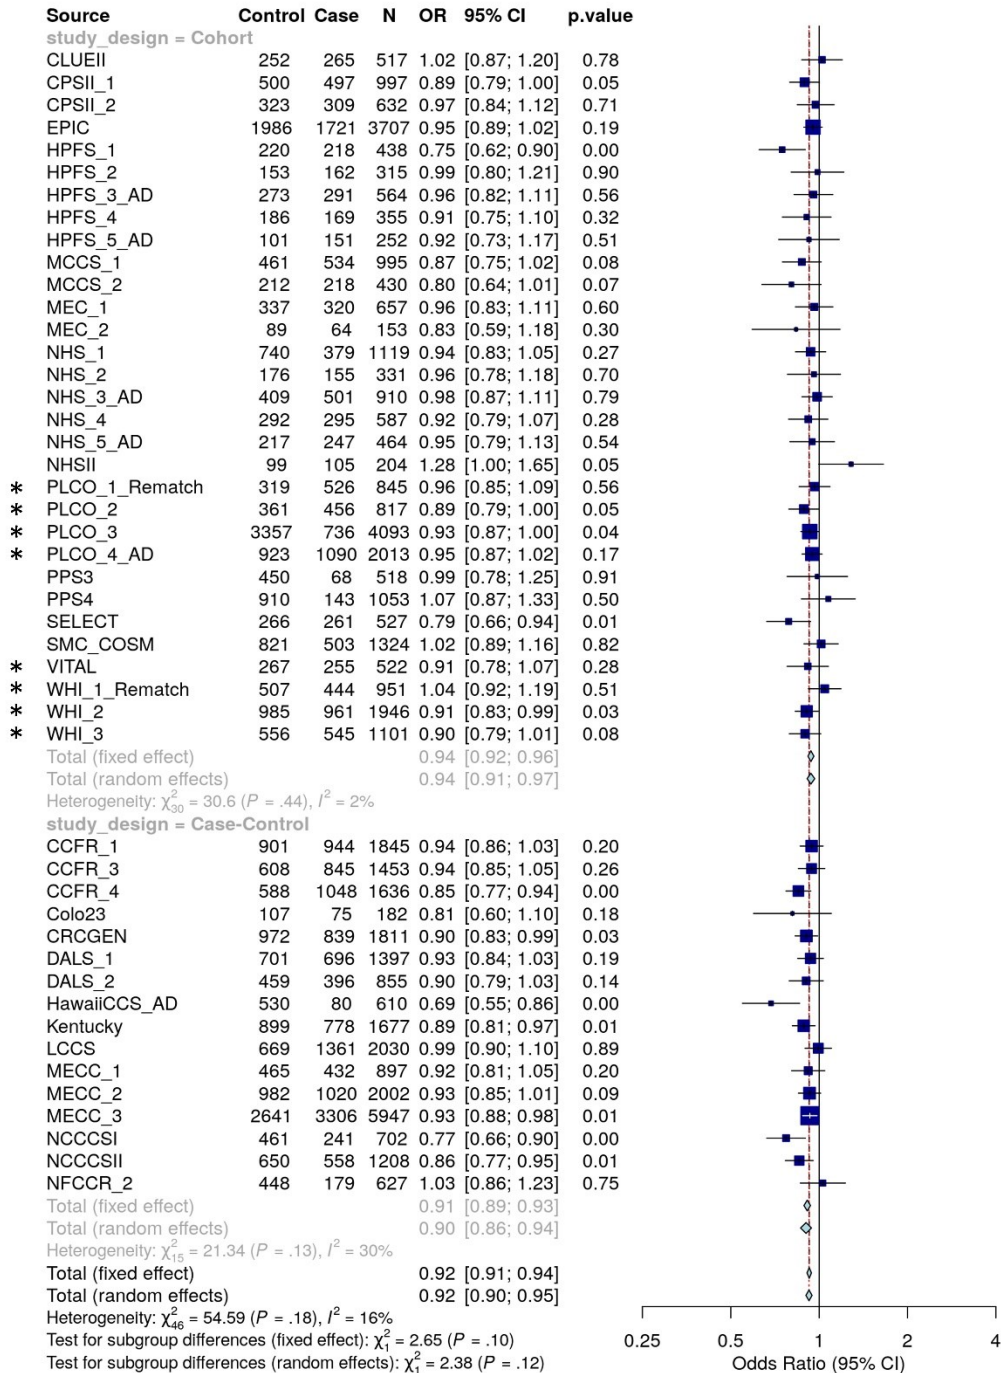

**Figure S3.** Meta-analysis of total folate on risk of colorectal cancer (CRC), stratified by folic acid fortification status. Per study models adjusted for age at referent time, sex, total energy consumption (kcal/day), body mass index (BMI), and smoking status (never/ever). In studies marked with an asterisk (\*) [namely, Prostate, Lung, Colorectal, & Ovarian Cancer Screening Trial (PLCO), VITamin And Lifestyle Study (VITAL), and Women’s Health Initiative (WHI)] times of enrollment overlapped or followed the period of folic acid fortification (1996-1998), which was accounted for when calculating dietary folate intake.
